## ERRATA

Corrections to “Condensation of Flowing Vapor on a Horizontal Tube—Numerical Analysis as a Conjugate Heat Transfer Problem,” by H. Honda and T. Fujii, published in the November 1984 issue of the ASME JOURNAL OF HEAT TRANSFER, pp. 841–848.

|               | Error                                                                                                                                                                                             | Correction                                                                                                                                                                                        |
|---------------|---------------------------------------------------------------------------------------------------------------------------------------------------------------------------------------------------|---------------------------------------------------------------------------------------------------------------------------------------------------------------------------------------------------|
| Equation (2)  | $U \frac{1}{r_o} \frac{\partial U}{\partial \varphi} + V \frac{\partial U}{\partial y} = U_\varphi \frac{1}{r_o} \frac{dU_\varphi}{d\varphi} + \nu_v \frac{\partial^2 U}{\partial y^2}$           | $U \frac{1}{r_o} \frac{\partial U}{\partial \varphi} + V \frac{\partial U}{\partial y} = U_\varphi \frac{1}{r_o} \frac{dU_\varphi}{d\varphi} + \nu_v \frac{\partial^2 U}{\partial y^2}$           |
| Equation (3)  | $\nu_L \frac{d^2 u}{L dy^2} + g \sin \varphi = 0$                                                                                                                                                 | $\nu_L \frac{d^2 u}{dy^2} + g \sin \varphi = 0$                                                                                                                                                   |
| Equation (14) | $z = \frac{2 \text{Re}_V}{d_0^2} \left\{ \int_\delta^{\delta+\Delta} \frac{U}{U_\varphi} \left( 1 - \frac{U}{U_\varphi} \right) dy \right\}^2$                                                    | $z = \frac{2 \text{Re}_V}{d_0^2} \left\{ \int_\delta^{\delta+\Delta} \frac{U}{U_\varphi} \left( 1 - \frac{U}{U_\varphi} \right) dy \right\}^2$                                                    |
| Equation (21) | $\frac{dX}{d\varphi} = \frac{1 - \bar{T}_{wo} - \frac{2}{3} A_{ov} X^4 \cos \varphi - \frac{1}{2} B_{ov} \frac{d\bar{\tau}_i}{d\varphi} X^3}{2A_{ov} X^3 \sin \varphi + B_{ov} \bar{\tau}_i X^2}$ | $\frac{dX}{d\varphi} = \frac{1 - \bar{T}_{wo} - \frac{2}{3} A_{ov} X^4 \cos \varphi - \frac{1}{2} B_{ov} \frac{d\bar{\tau}_i}{d\varphi} X^3}{2A_{ov} X^3 \sin \varphi + B_{ov} \bar{\tau}_i X^2}$ |

In Table 1,  $\phi$  should read  $\phi_o$ .

On p. 846, the lower half of the figure in column 1 should be exchanged with the figure in column 2.
